# Supplementary material for: Zn(NH3)CO3: a “three-in-one” UV nonlinear optical crystal built by a polar molecule bonding strategy
Source: Royal Society of Chemistry journal article supplement (doi:10.1039/d1tc04846e), 2021-01-01
Supplement: d1tc04846e1.pdf [file d1tc04846e1.pdf]

## **Zn(NH<sub>3</sub>)CO<sub>3</sub>: A “Three-in-One” UV Nonlinear Optical Crystal Built by Polar Molecule Bonding Strategy**

Hong-Xin Tang,<sup>a, b, d</sup> Qi-Rui Shui,<sup>a</sup> Rui-Biao Fu,<sup>\*a, b</sup> Zi-Qi Zhou,<sup>a</sup> Wen-Xiu Bao,<sup>a</sup> Zu-Ju Ma<sup>\*c</sup> and Xin-Tao Wu<sup>a</sup>

a. State Key Laboratory of Structural Chemistry, Fujian Institute of Research on the Structure of Matter, Chinese Academy of Sciences, Fuzhou, Fujian 350002, P. R. China.

b. Fujian Science & Technology Innovation Laboratory for Optoelectronic Information of China, Fuzhou, Fujian 350108, P. R. China.

c. School of Environmental and Materials Engineering, Yantai University, Yantai, Shandong 264005, P. R. China.

d. University of Chinese Academy of Sciences, Beijing, 100049, P. R. China.

\*Corresponding authors, E-mail: furb@fjirsm.ac.cn, zjma@outlook.com.

## Supplementary DFT calculations

In the static case, the imaginary part of the static second-order optical susceptibility can be expressed as:

$$\begin{aligned} \chi^{abc} &= \frac{e^3}{\hbar^2 \Omega} \sum_{nml,k} \frac{r_{nm}^a (r_{ml}^b r_{ln}^c + r_{ml}^c r_{ln}^b)}{2\omega_{nm} \omega_{ml} \omega_{ln}} [\omega_n f_{ml} + \omega_m f_{ln} + \omega_l f_{nm}] \\ &+ \frac{ie^3}{4\hbar^2 \Omega} \sum_{nm,k} \frac{f_{nm}}{\omega_{mn}^2} [r_{nm}^a (r_{mn;c}^b + r_{mn;b}^c) + r_{nm}^b (r_{mn;c}^a + r_{mn;a}^c) + r_{nm}^c (r_{mn;b}^a + r_{mn;a}^b)] \end{aligned} \quad (1)$$

where  $r$  is the position operator,  $\hbar\omega_{nm} = \hbar\omega_n - \hbar\omega_m$  is the energy difference for the bands  $m$  and  $n$ ,  $f_{mn} = f_m - f_n$  is the difference of the Fermi distribution functions, subscripts  $a$ ,  $b$ , and  $c$  are Cartesian indices, and  $r_{mn;a}^b$  is the so-called generalized derivative of the coordinate operator in  $k$  space,

$$r_{nm;a}^b = \frac{r_{nm}^a \Delta_{mn}^b + r_{nm}^b \Delta_{mn}^a}{\omega_{nm}} + \frac{i}{\omega_{nm}} \times \sum_l (\omega_{lm} r_{nl}^a r_{lm}^b - \omega_{nl} r_{nl}^b r_{lm}^a) \quad (2)$$

where  $\Delta_{nm}^a = (p_{nn}^a - p_{mm}^a) / m$  is the difference between the electronic velocities at the bands  $n$  and  $m$ . The  $\chi^{(2)}$  coefficients here were calculated from PBE wave functions with a  $5 \times 7 \times 9$  k-point grid and about 168 bands.

## Tables

Table S1. Crystallographic data for Zn(NH<sub>3</sub>)CO<sub>3</sub>.

|                                                                                            |                                     |
|--------------------------------------------------------------------------------------------|-------------------------------------|
| Empirical formula                                                                          | Zn(NH <sub>3</sub> )CO <sub>3</sub> |
| Formula weight                                                                             | 142.41                              |
| <i>T</i> (K)                                                                               | 293(2)                              |
| Crystal system                                                                             | orthorhombic                        |
| Space group                                                                                | <i>Pna</i> 2 <sub>1</sub>           |
| <i>a</i> (Å)                                                                               | 9.161(7)                            |
| <i>b</i> (Å)                                                                               | 7.592(6)                            |
| <i>c</i> (Å)                                                                               | 5.498(4)                            |
| <i>V</i> (Å <sup>3</sup> )                                                                 | 382.4(5)                            |
| <i>Z</i>                                                                                   | 4                                   |
| $\rho_{\text{calcd}}$ (g·cm <sup>-3</sup> )                                                | 2.474                               |
| $\mu$ (mm <sup>-1</sup> )                                                                  | 6.266                               |
| <i>F</i> (000)                                                                             | 280.0                               |
| <i>R</i> <sub>int</sub>                                                                    | 0.0445                              |
| GOF on <i>F</i> <sup>2</sup>                                                               | 1.153                               |
| Flack factor                                                                               | 0.04(5)                             |
| <i>R</i> <sub>1</sub> , <i>wR</i> <sub>2</sub> ( <i>I</i> > 2σ( <i>I</i> )) <sup>[a]</sup> | 0.0332, 0.0803                      |
| <i>R</i> <sub>1</sub> , <i>wR</i> <sub>2</sub> (all data)                                  | 0.0343, 0.0812                      |

[a]  $R_1 = \sum ||F_o| - |F_c|| / \sum |F_o|$ ;  $wR_2 = \{\sum w[(F_o)^2 - (F_c)^2]^2 / \sum w[(F_o)^2]^2\}^{1/2}$ .

Table S2. Atomic coordinates, equivalent isotropic displacement parameters (Å<sup>2</sup>) and bond valence sums (BVS) of Zn(NH<sub>3</sub>)CO<sub>3</sub>. *U*<sub>eq</sub> is defined as one-third of the trace of the orthogonalized *U*<sub>ij</sub> tensor.

| Atom | Wyckoff | x          | y           | z          | <i>U</i> <sub>eq</sub> | BVS  |
|------|---------|------------|-------------|------------|------------------------|------|
| Zn1  | 4a      | 0.14437(6) | -0.16822(8) | 0.4629(3)  | 0.0213(2)              | 2.03 |
| O1   | 4a      | 0.2213(5)  | 0.0466(6)   | 0.3001(10) | 0.0278(10)             | 1.85 |
| O2   | 4a      | 0.1587(5)  | 0.2783(7)   | 0.0786(10) | 0.0276(11)             | 1.84 |
| O3   | 4a      | -0.0128(4) | 0.1011(6)   | 0.2235(9)  | 0.0217(9)              | 1.84 |
| N1   | 4a      | 0.0671(7)  | -0.3304(7)  | 0.2051(12) | 0.0301(13)             | 2.96 |
| C1   | 4a      | 0.1234(7)  | 0.1420(8)   | 0.2035(13) | 0.0186(11)             | 4.03 |
| H1   | 4a      | 0.08704    | -0.28608    | 0.05896    | 0.0360                 | 0.99 |
| H2   | 4a      | -0.02908   | -0.34146    | 0.22203    | 0.0360                 | 0.99 |
| H3   | 4a      | 0.10907    | -0.43557    | 0.21995    | 0.0360                 | 0.99 |

Table S3. Selected bond lengths (Å) of Zn(NH<sub>3</sub>)CO<sub>3</sub>.

| Bond         | Bond lengths | Bond      | Bond lengths |
|--------------|--------------|-----------|--------------|
| Zn(1)–O(1)   | 1.989(5)     | C(1)–O(1) | 1.270(8)     |
| Zn(1)–O(2)#1 | 1.956(5)     | C(1)–O(2) | 1.283(8)     |
| Zn(1)–O(3)#2 | 1.940(5)     | C(1)–O(3) | 1.291(8)     |
| Zn(1)–N(1)   | 2.007(6)     |           |              |

Symmetry codes: #1 1/2-x, -1/2+y, 1/2+z; #2 -x, -y, 1/2+z.

Table S4. Selected bond angles (deg.) of Zn(NH<sub>3</sub>)CO<sub>3</sub>.

| Bond                | Bond angles | Bond              | Bond angles |
|---------------------|-------------|-------------------|-------------|
| O(1)–Zn(1)–N(1)     | 108.1(2)    | N(1)–Zn(1)–O(3)#2 | 117.6(2)    |
| O(1)–Zn(1)–O(2)#1   | 89.4(2)     | O(1)–C(1)–O(2)    | 120.4(6)    |
| O(1)–Zn(1)–O(3)#2   | 109.7(2)    | O(1)–C(1)–O(3)    | 120.7(6)    |
| O(2)#1–Zn(1)–O(3)#2 | 112.8(2)    | O(2)–C(1)–O(3)    | 118.9(6)    |
| N(1)–Zn(1)–O(2)#1   | 115.3(3)    |                   |             |

Symmetry codes: #1 1/2-x, -1/2+y, 1/2+z; #2 -x, -y, 1/2+z.

Table S5. The local dipole moment ( $\mu$ ) of Zn(NH<sub>3</sub>)CO<sub>3</sub> in Debye.

|                                     | $\mu_x$ | $\mu_y$ | $\mu_z$  | $ \mu $ |
|-------------------------------------|---------|---------|----------|---------|
| ZnO <sub>3</sub> (NH <sub>3</sub> ) | -3.0699 | -5.1258 | -5.0941  | 7.85    |
| ZnO <sub>3</sub> (NH <sub>3</sub> ) | -3.0699 | 5.1258  | -5.0941  | 7.85    |
| ZnO <sub>3</sub> (NH <sub>3</sub> ) | 3.0699  | 5.1258  | -5.0941  | 7.85    |
| ZnO <sub>3</sub> (NH <sub>3</sub> ) | 3.0699  | -5.1258 | -5.0941  | 7.85    |
| Total                               | 0       | 0       | -20.3764 |         |

## Figures

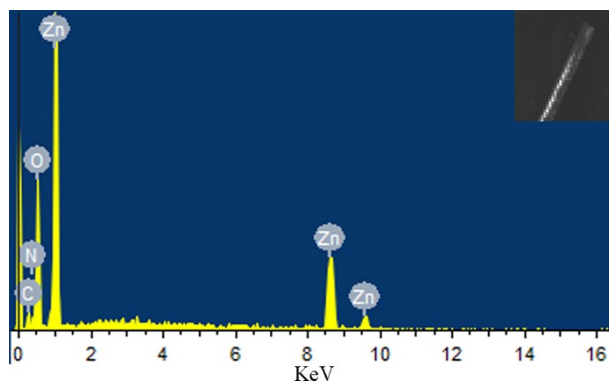

Figure S1. EDS spectrum of Zn(NH<sub>3</sub>)CO<sub>3</sub>.

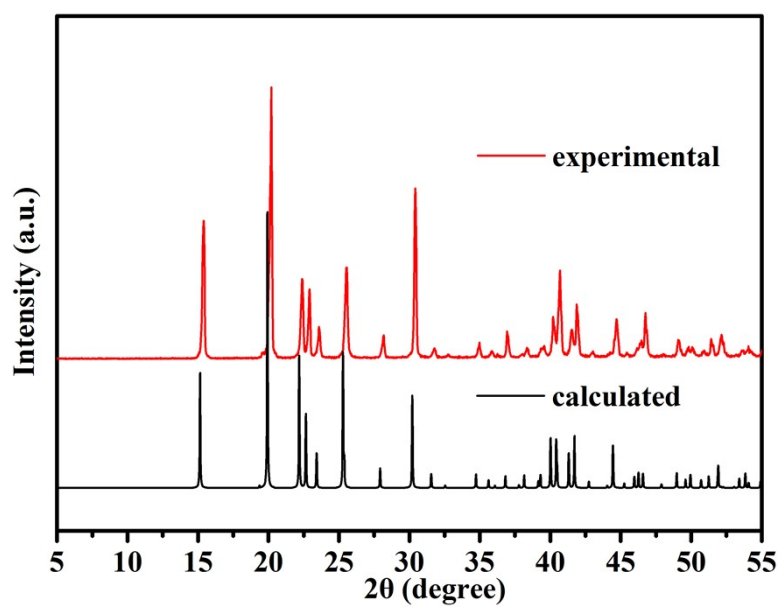

Figure S2. PXRD pattern of Zn(NH<sub>3</sub>)CO<sub>3</sub>.

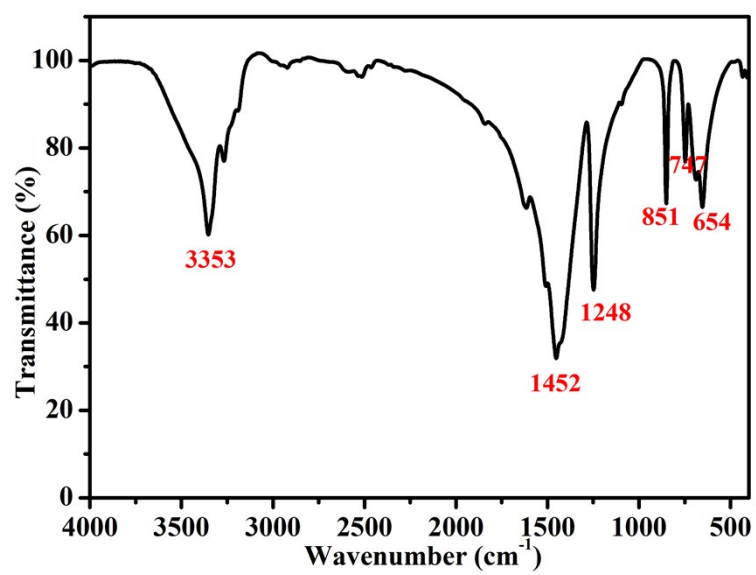

Figure S3. IR spectrum of Zn(NH<sub>3</sub>)CO<sub>3</sub>.

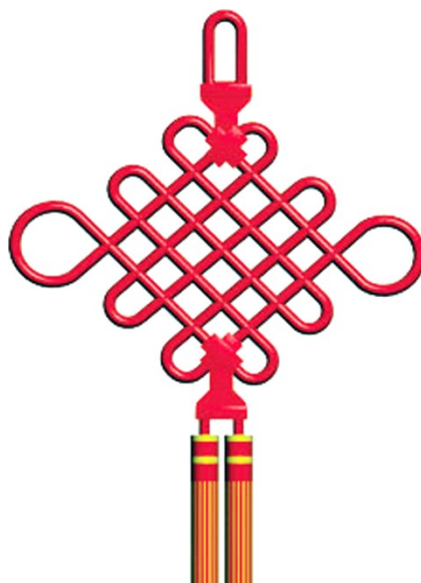

Figure S4. A Chinese knot.

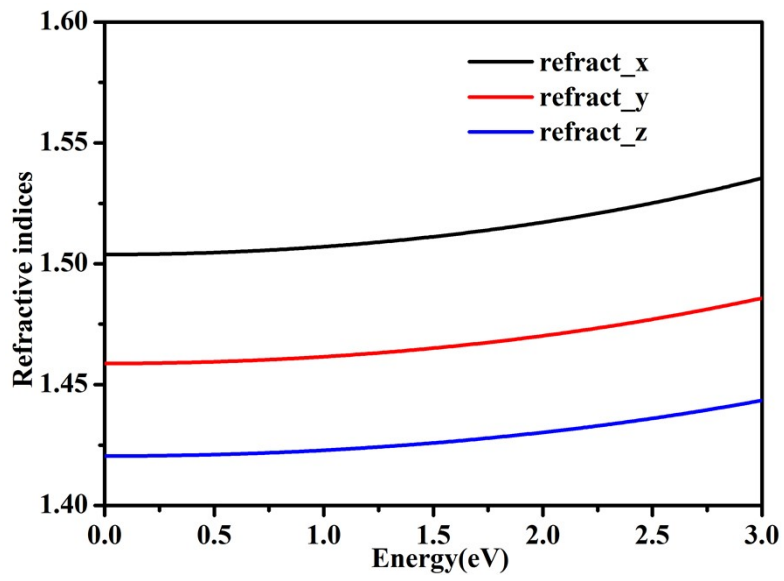

Figure S5. The calculated frequency-dependent refractive indices of Zn(NH<sub>3</sub>)CO<sub>3</sub>.

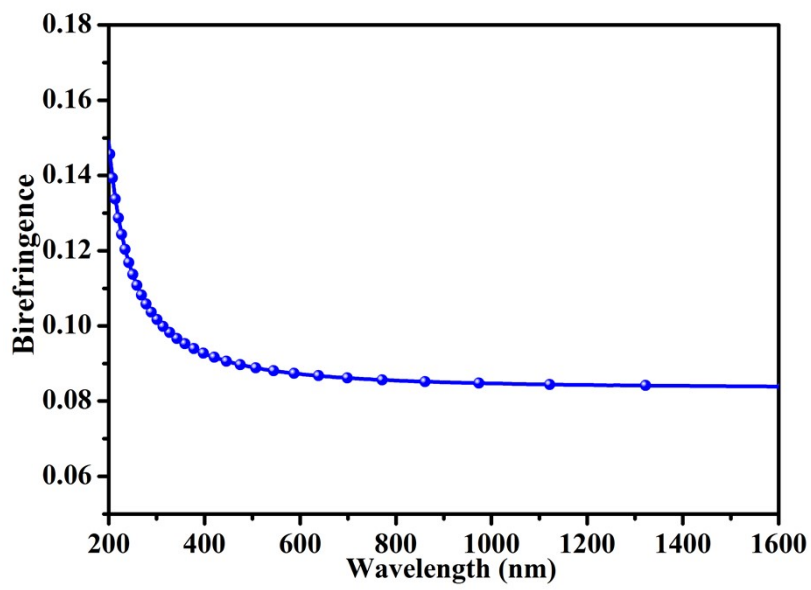

Figure S6. The birefringence of Zn(NH<sub>3</sub>)CO<sub>3</sub>.

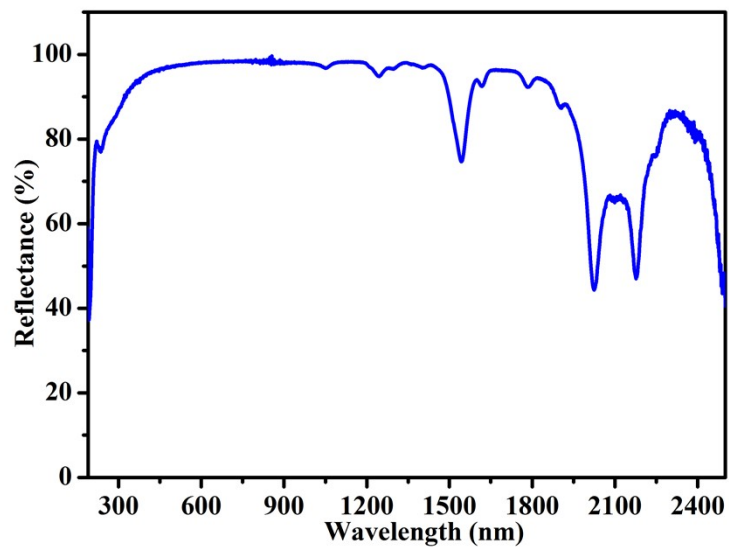

Figure S7. The UV-vis-NIR diffuse reflectance spectrum of  $\text{Zn}(\text{NH}_3)\text{CO}_3$ . The absorption peak at 1543, 1900–2300 nm may be caused by the overtone vibration of N–H bond.

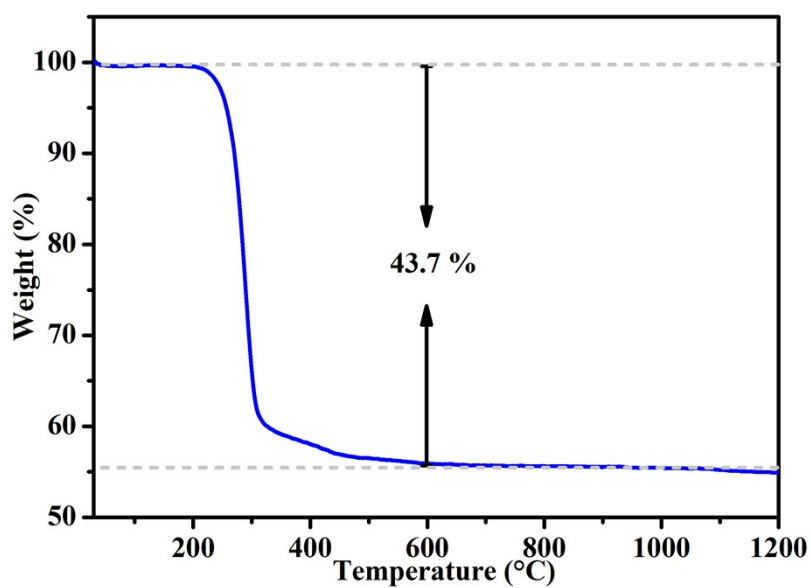

Figure S8. TG curve of  $\text{Zn}(\text{NH}_3)\text{CO}_3$ .



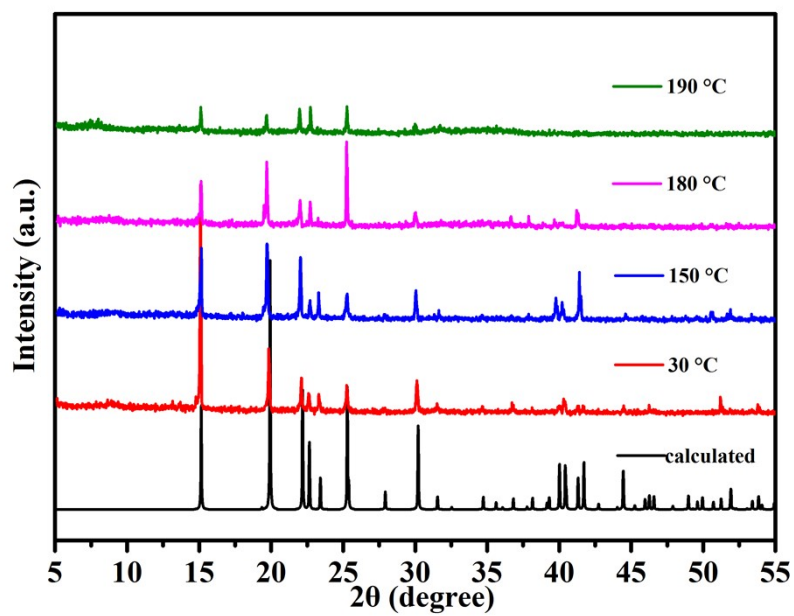

Figure S9. Variable temperature PXRD pattern of  $\text{Zn}(\text{NH}_3)\text{CO}_3$ .

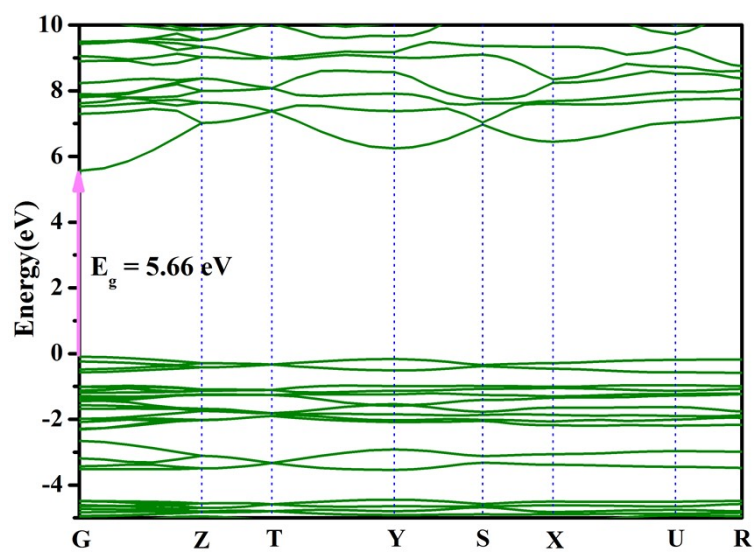

Figure S10. The calculated band structure of  $\text{Zn}(\text{NH}_3)\text{CO}_3$ .

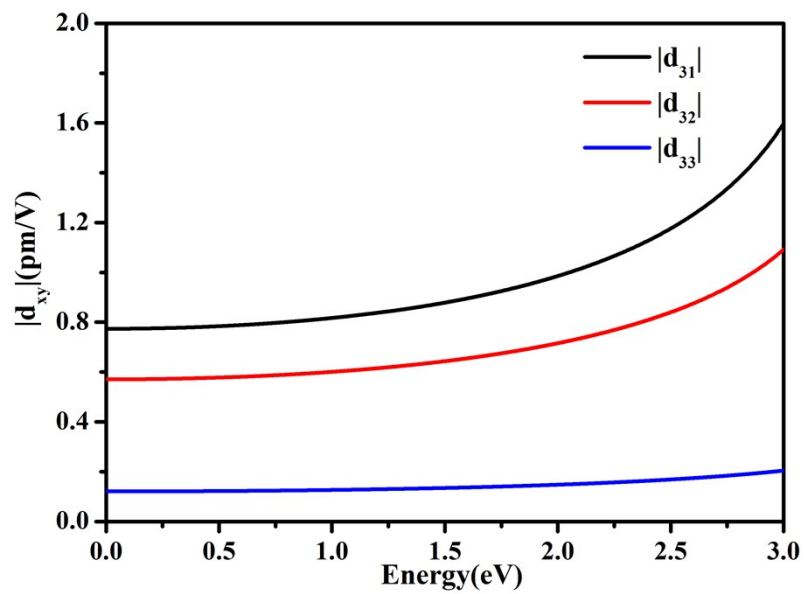

Figure S11. The frequency-dependent SHG coefficients of Zn(NH<sub>3</sub>)CO<sub>3</sub>.
